# 1 Genomic analysis of fast expanding 2 bacteria reveals new molecular adaptive 3 mechanisms

4  
5  
6  
7 Lars Bosshard<sup>1,2\*</sup>, Stephan Peischl<sup>2,3</sup>, Martin Ackermann<sup>4,5</sup>, Laurent Excoffier<sup>1,2\*</sup>

8 <sup>1</sup> CMPG, Institute of Ecology and Evolution, University of Berne, 3012 Berne, Switzerland

9 <sup>2</sup> Swiss Institute of Bioinformatics, 1015 Lausanne, Switzerland

10 <sup>3</sup> Interfaculty Bioinformatics Unit, University of Berne, 3012 Berne, Switzerland

11 <sup>4</sup> Institute of Biogeochemistry and Pollutant Dynamics, Swiss Federal Institute of Technology Zurich  
12 (ETH Zürich), 8092 Zürich, Switzerland

13 <sup>5</sup> Department of Environmental Microbiology, Swiss Federal Institute of Aquatic Science and  
14 Technology (Eawag), 8600 Dübendorf, Switzerland

15

16

17

18

19

20

## 21 **Contact information**

22 Laurent Excoffier and Lars Bosshard

23 CMPG, Institute of Ecology and Evolution

24 University of Berne

25 Baltzerstrasse 6

26 3012 Berne, Switzerland

27 Email: [laurent.excoffier@iee.unibe.ch](mailto:laurent.excoffier@iee.unibe.ch) and [lars.bosshard@iee.unibe.ch](mailto:lars.bosshard@iee.unibe.ch)

28

29

30 **Running head:** Response to selection for rapid range expansion in bacteria

31 **Keywords:** experimental evolution, range expansion

## 32 Abstract

33 Bacterial populations have been shown to accumulate deleterious mutations during spatial  
34 expansions that overall decrease their fitness and ability to grow. However, it is unclear if and  
35 how they can respond to selection in face of this mutation load. We examine here if artificial  
36 selection can counteract the negative effects of range expansions. We investigated the  
37 molecular evolution of 20 lines (SEL) selected for fast expansions and compared them to 20  
38 lines without artificial selection (CONTROL). We find that all 20 SEL lines have been able to  
39 increase their expansion speed relative to the ancestral line, unlike CONTROL lines, showing  
40 that enough beneficial mutations are produced during spatial expansions to counteract the  
41 negative effect of expansion load. Importantly, SEL and CONTROL lines have similar numbers  
42 of mutations indicating that they evolved for the same number of generations and that increased  
43 fitness is not due to a purging of deleterious mutations. We find that loss of function (LOF)  
44 mutations are better at explaining the increased expansion speed of SEL lines than non-  
45 synonymous mutations or a combination of the two. Interestingly, most LOF mutations are  
46 found in simple sequence repeats located in genes involved in gene regulation and gene  
47 expression. We postulate that such potentially reversible mutations could play a major role in  
48 the rapid adaptation of bacteria to changing environmental conditions by shutting down  
49 expensive genes and adjusting gene expression.

50

## 51 Author Summary

52 We investigated if strong artificial selection for fast expansion can counteract the negative  
53 effects of range expansion which had been shown to lead to an accumulation of deleterious  
54 mutations. This experiments showed that i) an increase in expansion speed could occur if  
55 bacteria were selected from the largest protruding sectors, and ii) that artificially selected  
56 bacterial lines accumulated about the same number of mutations than simply expanding line  
57 suggesting that the observed increased fitness is not due to increased purifying selection where  
58 deleterious mutations would have been removed in fast growing lines. We find that loss of  
59 function (LOF) mutations are best explaining the observed increased expansion speed in  
60 selected lines. These mutations, which are known to play an important role in adaptive  
61 processes in bacterial populations, frequently consist in small insertion-deletions in simple  
62 sequence repeats, and are thus relatively easily reversible. They could thus act as switches that  
63 can reversibly shut down genes. Our results therefore suggest that shutting down expensive  
64 genes and adjusting gene expression are important for adaptive processes during range  
65 expansion.

66

67

## 68 Introduction

69 Theoretical studies have recently predicted that spatial expansion of populations can lead to the  
70 fixation of deleterious mutations (1, 2) due to small effective size and inefficient selection on  
71 range margins. When a spatial expansion proceeds for a long time, edge populations tend to  
72 accumulate a series of deleterious mutations, leading to a decrease in fitness over time and space  
73 (3, 4). This “expansion load” (3) can potentially affect the speed of the expansion and impose  
74 constraints on the limits of a species range (5). Our recent empirical work supported these  
75 theoretical predictions, and showed that spatially expanding bacterial colonies accumulated  
76 deleterious mutations that impacted their fitness (6).

77 However, the accumulation of deleterious mutations is potentially not the only relevant  
78 evolutionary process in expanding populations. Under some conditions, populations that  
79 expand their range might experience selection for rapid range expansion (7). There are  
80 potentially two different mechanisms for adaption for individuals at the front in a radial  
81 expansion: (i) Resources are more abundant on the front than in the core of the colony therefore  
82 cells of the same type grow faster at the front than in the core and adaption can occur by enable  
83 individuals to reach the front. (ii) Fast expanding bacteria at the front can outcompete bacteria  
84 expanding more slowly in neighboring sectors and thus expand sideways. While reaching the  
85 front does not necessarily lead to a faster expansion since there can be a negative tradeoff  
86 between growth rate and the ability to reach the front, competition at the front should increase  
87 the expansion speed in all cases. In general, selection for rapid range expansion can occur under  
88 the same conditions as selection for rapid dispersal, with the caveat that selection for rapid range  
89 expansion requires more stringent conditions. Indeed, it requires that different groups of  
90 individuals compete with each other (groups that are located at different locations of a two  
91 dimensional expansion front), in contrast to evolution for rapid dispersal that is based on  
92 competition between different individuals competing for being at the front. One would thus

93 expect that selection for rapid range expansion is only effective in certain types of organisms,  
94 namely organisms that form very large populations and expand their ranges on wide fronts  
95 where different clonal sectors can compete.

96 Under conditions where selection for rapid range expansion is expected, it is important to  
97 consider its consequences for genome evolution. As mentioned above, range expansion leads  
98 to a reduction in the effective population size on the front and consequently to an accumulation  
99 of deleterious mutations in edge individuals. It is yet unclear how this mutation accumulation  
100 process would interfere and potentially hinder adaptive genome evolution, if for instance there  
101 is (artificial) selection for rapid range expansion, One can imagine two fundamentally different,  
102 but not mutually exclusive, ways how mutation accumulation and adaptive evolution can  
103 interact. First, the fastest expanding groups of individual could harbor fewer deleterious  
104 mutations than other groups at the expansion front and thus grow faster. Second, the fastest  
105 expanding groups of individuals could accumulate similar amounts of deleterious mutations as  
106 other groups of individuals, but they could harbor more beneficial mutations, or an equal  
107 number of positively selected mutations that would have larger effects. Discriminating between  
108 these different scenarios is a novel and interesting endeavor.

109 Here, we addressed this question by performing an evolution experiment with populations of  
110 the bacterium *E. coli*. We let replicated populations of this bacterium expand their range by  
111 placing them on a solid surface of nutritious medium and letting them expand radially, forming  
112 an approximately circular expanding population. After three days of expansion (corresponding  
113 to about 127 generations), we selected the section of the colony edge that had expanded furthest.  
114 We collected about one million individuals from the outer edge of this protruding sector and  
115 transferred them to a new habitat where we let them again expand. We thus imposed a regime  
116 where only individuals belonging to the fastest growing sector could continue to evolve,  
117 whereas all other individuals were removed.

118 We performed this evolution experiment independently in 20 populations, starting from the  
119 same ancestral strain. In addition, we also evolved 20 control populations that were propagated  
120 in the same way with the important difference that the sector of the front from which individuals  
121 were selected to be transferred to a new habitat was chosen at random, thus without imposing  
122 any selection for rapid range expansion. As in our previous range expansion experiment, we  
123 worked with a mutator strain of *E. coli* having a mutation rate about 200 times higher than that  
124 of wild-type *E. coli*.

125 Our goal here is two-fold. First, we ask whether there is a response to selection for increased  
126 range expansion. As mentioned above, it is a priori not clear how the balance between mutation  
127 accumulation and adaptive evolution will occur in such an experiment. As a consequence, it is  
128 not clear whether this regime allows the selection of an increased expansion rate. Our second  
129 goal is to analyze the magnitude and the quality of the genomic changes under control and  
130 selected conditions. We are thus interested in examining how the interplay between mutation  
131 accumulation and adaptive evolution shapes the genomes of the populations that we selected  
132 for rapid expansion, and how this compares to the genomic evolution of controls without  
133 selection.

134 If we were to observe more rapid range expansions, we could ask more specifically which  
135 biological alterations would underlie such a response. One possibility to increase expansion  
136 speed is to increase the rate at which individual cells grow and divide. This would likely involve  
137 mutations in metabolic pathways, genes for nutrient transporter, and genes responsible for gene  
138 expression regulation. Another possible mechanism could be spatial sorting (8), where bacteria  
139 would evolve phenotypic traits that would allow them to move within the expanding  
140 populations and reach the edge of the expansion faster, without necessarily having a higher  
141 growth rate. This spatial sorting phenomenon has been invoked in a recent study where it was  
142 shown that alterations of surface proteins influenced the positioning of bacterial cells within an

143 expanding population (9). The dissection of newly accumulated mutations should thus provide  
144 us with useful insights into the molecular bases of adaptation during range expansions.

145

## 146 Results

### 147 Increase in expansion speed

148 We let *E. coli* strains expand radially on top of agar plates for 13 periods of 3 days. We  
149 compared 20 lines that were sampled at a random place after each period of 3 days (CONTROL  
150 lines) to 20 lines that were sampled at the point of the colony that expanded the farthest (SEL  
151 lines) (see Methods). The colony size was measured after every growth period of 3 days. We  
152 find that the CONTROL colony sizes decreased significantly over time ( $-77 \mu\text{m}/\text{day}$ , 95% C.I.  
153  $[-95; -60]$ , p-value:  $< 2 \times 10^{-16}$ ), whereas the size of the SEL colonies increased significantly  
154 ( $227 \mu\text{m}/\text{day}$ , 95% C.I.  $[192; 262]$ , p-value:  $< 2 \times 10^{-16}$ ) (**Figure 1**). Thus, after 39 days,  
155 CONTROL colony sizes decreased by 33% on average (t-test: p-value  $< 2.2 \times 10^{-16}$ , 95% C.I.  
156  $[29; 38]$ ), whereas those of SEL lines increased by 130% (t-test: p-value  $< 2.2 \times 10^{-16}$ , 95% C.I.  
157  $[119; 142]$ ). We used a linear mixed-effect model to determine the dynamics of expansion  
158 velocity change over time. A quadratic term in the mixed effect model explains the data  
159 significantly better than a simple linear model (CONTROL: likelihood ratio 7.14, p-value =  
160 0.0075; SEL: likelihood ratio 25.98, p-value  $< 0.0001$ ). There is thus a saturation effect in both  
161 conditions (SEL and CONTROL) over time.

### 162 Similar number of mutations in both lines

163 The average number of mutations is 124.9 in CONTROL lines and 129.8 in SEL lines (**Figure**  
164 **2**). We tested for a significant difference in mutations numbers between the groups using a non-  
165 parametric Mann-Whitney test, since the variance in the number of mutations was found  
166 significantly different in the two groups (variance SEL = 1273.36, variance CONTROL =  
167 499.15, p-value: 0.048 with a Bartlett test of homogeneity of variance). However, we do not  
168 find any significant difference in the number of accumulated mutations between the SEL and  
169 CONTROL lines (p-value: 0.7048). Similarly, the dN/dS ratios were not significantly different  
170 between the two groups (CONTROL lines: 1.138, SEL lines: 0.995, Mann-Whitney test: p-



171 value =0.097). As previously described (6), the mutations are distributed along the genome with  
172 a periodic pattern that is repeated nearly in mirror-image across the genome (**Figure 2B**)  
173 centered on the origin of the genome replication. This uneven genomic distribution of the  
174 mutations implies that there is a variable mutation rate during the replication of the genome,  
175 but that the two replication forks have similar changes in mutation rate as they traverse the  
176 chromosome. We estimated these variable mutation rates across the genome by a wavelet  
177 transformation (10) (**Figure 2B**).

### 178 **LOF mutations as a main driver of adaptation**

179 We used Elastic Net (EN) regression (11), which performs both variable selection and variable  
180 regularization (see Material and Methods), to determine the subset of genes that have the largest  
181 effect on the expansion speed in bacteria. The resulting significant coefficient associated to a  
182 gene is its net effect on final colony size relative to the initial colony size. With this analysis,  
183 we determined which genes explain the difference in colony size between the SEL and  
184 CONTROL conditions. We used the EN regression to predict colony size from three different  
185 sets of mutations. First, we used the combination of all non-synonymous substitutions, as well  
186 as frameshift and non-sense mutations (**Table S1**). Second, we analyzed separately frameshift  
187 and non-sense mutations. Note that non-sense mutations can be considered loss of function  
188 (LOF) mutations for a specific gene (**Table 1**). Finally, we used only non-synonymous  
189 mutations, which could be a target for adaptation without loss of gene function (**Table S2**). We  
190 then compared the mean cross-validation error of these models, and find that LOF mutations  
191 significantly better explain colony size change (mean error=0.3258) than all mutations taken  
192 together (mean error = 0.4105,  $p = 1.06 \cdot 10^{-10}$ ) or than non-synonymous mutation alone (mean  
193 error = 0.4033,  $p = 4.85 \cdot 10^{-10}$ ).

194 Focusing on LOF mutations, we find a total of 43 genes significantly associated with increased  
195 colony size and 34 genes significantly associated with a colony size reduction. Quite

196 remarkably, almost all genes leading to a significant increase in colony size are targets of  
197 mutations in SEL lines, whereas all genes leading to a significant decrease in colony size are  
198 target of mutations in CONTROL lines (**Table 1**). The only exceptions are two genes connected  
199 to ATPases (*gsiA* and *yjgR*), where mutations occur in both SEL and CONTROL line.  
200 Mutations in these genes lead to an increased colony size, in agreement with the previous  
201 observation that there is still some adaptation going on in CONTROL lines (6).

202 Genes leading to either increased or decreased colony size are involved in metabolic process,  
203 transport, gene regulation, biofilm formation, as well as tRNA and rRNA genes. There is  
204 evidence for an association between the number of significant genes we find in the gene  
205 categories and the impact that mutation in these significant genes have on colony size (increase  
206 or decrease of colony size) (Chi-squared test, p-value = 0.009) (**Figure S5**). Compared to genes  
207 that decrease colony size, there are more genes leading to an increase in colony size that are  
208 involved in the transport of substances through the cell membrane or in processes associated  
209 with ribosomes and in tRNAs. In contrast, there are more genes that lead to a decrease in colony  
210 size that are involved in metabolic processes (**Table 1, Figure S5**). Additionally, we find two  
211 genes where mutations lead to a decreased in colony size that are involved in cell division. Note  
212 however, that a separate GO enrichment analysis for genes leading to significant increase or  
213 decreased colony size with the EN analysis did not reveal any significant term.

214 Finally, it is worth emphasizing that seven genes leading to an increased colony expansion are  
215 connected to tRNAs (*leuP*, *leuV*, *leuT*, *leuQ*, *aspU*) or rRNAs (*rrlA*, *rrlC*), but that only one  
216 gene connected to rRNA leads to a decrease in colony expansion (*rsmF*) (**Table 1**). Quite  
217 remarkably, four out of eight copies of the leucine tRNA have been targeted by indel mutations  
218 and all lead to a large increase in colony size.

220

221 **Table 1:** Effects of LOF mutations on bacterial growth, as inferred by the Elastic Net  
 222 regression. Effect sizes are relative to the initial colony size. Orange: genes that have  
 223 mutations in SEL lines, blue: genes that have mutations in CONTROL lines, violet:  
 224 genes that have mutations in both CONTROL and SEL lines.

| increased colony size |             |        |                                 | decreased colony size |             |              |                              |                              |                   |
|-----------------------|-------------|--------|---------------------------------|-----------------------|-------------|--------------|------------------------------|------------------------------|-------------------|
| SEL,CTR               | gene        | effect | description                     |                       | CTR,SEL     | gene         | effect                       | description                  |                   |
| 4                     | <i>leuP</i> | 0.648  | leucine tRNA                    | RNA                   | 2           | <i>ytfT</i>  | -0.234                       | galactose transporter        | transport         |
| 4                     | <i>rrlC</i> | 0.433  | component of ribosome           |                       | 2           | <i>insL1</i> | -0.127                       | transposon                   |                   |
| 2                     | <i>leuV</i> | 0.319  | leucine tRNA                    |                       | 1           | <i>chbC</i>  | -0.010                       | transporter protein          |                   |
| 4                     | <i>leuT</i> | 0.229  | leucine tRNA                    |                       | 3           | <i>yjcZ</i>  | -0.182                       | NA                           | NA                |
| 3                     | <i>leuQ</i> | 0.133  | leucine tRNA                    |                       | 1           | <i>yghR</i>  | -0.005                       | NA                           |                   |
| 1                     | <i>aspU</i> | 0.083  | aspartate tRNA                  |                       | 1           | <i>ybdR</i>  | -0.009                       | NA                           |                   |
| 1                     | <i>rrlA</i> | 0.033  | component of ribosome           |                       | 1           | <i>yedJ</i>  | -0.008                       | NA                           |                   |
| 2                     | <i>treA</i> | 0.349  | metabolic process               |                       | 1           | <i>yqeL</i>  | -0.004                       | NA                           |                   |
| 1                     | <i>pflC</i> | 0.118  | carbohydrate metaolic process   | 1                     | <i>yibS</i> | -0.004       | NA                           |                              |                   |
| 1                     | <i>lplA</i> | 0.118  | protein lipoylation             | 1                     | <i>yncG</i> | -0.001       | NA                           |                              |                   |
| 2                     | <i>hyaB</i> | 0.098  | energy metabolism               | Metabolic process     | 3           | <i>sfsA</i>  | -0.154                       | transcriptional regulator    | regulator         |
| 1                     | <i>ycjT</i> | 0.073  | metabolic process               |                       | 1           | <i>prpR</i>  | -0.012                       | transcriptional regulator    |                   |
| 1                     | <i>ampD</i> | 0.035  | peptidoglycan catabolic process |                       | 1           | <i>sgrR</i>  | -0.011                       | transcriptional regulator    |                   |
| 2                     | <i>ydfJ</i> | 0.281  | transporter protein             |                       | 4           | <i>atoB</i>  | -0.126                       | metabolic process            | metabolic process |
| 2                     | <i>acrB</i> | 0.139  | multidrug efflux system         |                       | 2           | <i>phoA</i>  | -0.066                       | metabolic process            |                   |
| 2                     | <i>narK</i> | 0.119  | nitrate transporter             |                       | 1           | <i>dadA</i>  | -0.013                       | amino acid catabolic process |                   |
| 2                     | <i>lplT</i> | 0.097  | lipid transport                 | 1                     | <i>paaK</i> | -0.012       | metabolic process            |                              |                   |
| 2                     | <i>mngA</i> | 0.096  | transporter protein             | 1                     | <i>puuD</i> | -0.012       | metabolic process            |                              |                   |
| 1                     | <i>cmtB</i> | 0.083  | carbohydrate transport          | 1                     | <i>sufS</i> | -0.011       | metabolic process            |                              |                   |
| 1                     | <i>potH</i> | 0.079  | transporter protein             | 1                     | <i>cobT</i> | -0.011       | nucleoside synthetic process |                              |                   |
| 1                     | <i>tamB</i> | 0.076  | protein secretion               | 1                     | <i>waaJ</i> | -0.010       | lipopolysaccharide synthesis |                              |                   |
| 7,3                   | <i>gsiA</i> | 0.072  | glutathione transporter         | 1                     | <i>efeB</i> | -0.009       | iron assimilation            |                              |                   |
| 1                     | <i>arnF</i> | 0.036  | transport                       | 1                     | <i>phnL</i> | -0.009       | metabolic process            |                              |                   |
| 1                     | <i>yecC</i> | 0.030  | cystine transporter             | 1                     | <i>cpdB</i> | -0.008       | metabolic process            |                              |                   |
| 3                     | <i>ydcR</i> | 0.253  | transcriptional regulator       | 1                     | <i>yfbT</i> | -0.006       | metabolic process            |                              |                   |
| 1                     | <i>trpR</i> | 0.077  | tryptophan regulator            | 1                     | <i>menE</i> | -0.006       | metabolic process            |                              |                   |
| 1                     | <i>yjjM</i> | 0.029  | trancriptional regulator        | 1                     | <i>sodC</i> | -0.003       | metabolic process            |                              |                   |
| 4                     | <i>ecpC</i> | 0.142  | pilus formation                 | Biofilm and mobility  | 2           | <i>minC</i>  | -0.125                       | cell division                | 1)                |
| 1                     | <i>ybhK</i> | 0.116  | regulation of cell shape        |                       | 1           | <i>helD</i>  | -0.013                       | DNA helicase                 |                   |
| 1                     | <i>fdrA</i> | 0.082  | flagellum mobility              |                       | 3           | <i>elfC</i>  | -0.121                       | pilus assembly               | 2)                |
| 1                     | <i>carB</i> | 0.081  | biofilm formation               |                       | 3           | <i>elfG</i>  | -0.087                       | cell adhesion                |                   |
| 1                     | <i>pbpC</i> | 0.080  | regulation of cell shape        |                       | 1           | <i>ecpE</i>  | -0.012                       | pilus chaperone              |                   |
| 3                     | <i>fliJ</i> | 0.059  | flagellar export                |                       | 1           | <i>yjbE</i>  | -0.006                       | biofilm formation            |                   |
| 1                     | <i>wcaB</i> | 0.032  | colanic acid synthesis          |                       | 1           | <i>rsmF</i>  | -0.012                       | rRNA processing              |                   |
| 1                     | <i>ybgQ</i> | 0.031  | pilus assembly                  |                       |             |              |                              |                              |                   |
| 3                     | <i>yggN</i> | 0.020  | biofilm formation               |                       |             |              |                              |                              |                   |
| 1                     | <i>yeiS</i> | 0.114  | inner membrane protein          |                       | me          |              |                              |                              |                   |

|     |             |       |                        |    |
|-----|-------------|-------|------------------------|----|
| 1   | <i>yjwW</i> | 0.112 | inner membrane protein | mb |
| 2   | <i>yqiJ</i> | 0.079 | inner membrane protein |    |
| 1   | <i>bcsG</i> | 0.035 | inner membrane protein |    |
| 3   | <i>yqeC</i> | 0.108 | NA                     | NA |
| 4,1 | <i>yjgR</i> | 0.090 | NA                     |    |
| 1   | <i>yciW</i> | 0.075 | NA                     |    |

|  |                                               |
|--|-----------------------------------------------|
|  | Mutation found in SEL , effect > 0.2          |
|  | Mutation found in SEL , 0.2 >= effect > 0.1   |
|  | Mutation found in SEL , 0.1 >= effect         |
|  | Mutation found in CTR , effect < -0.1         |
|  | Mutation found in CTR , -0.1 <= effect        |
|  | Mutation found in SEL and CTR , 0.1 >= effect |

225

226 1) cell division, 2) biofilm and mobility, 3) RNA.

227

## 228 Convergent Adaptation via LOF Mutations

229 We looked for signals of convergent adaptation by searching for mutations that have targeted  
230 the same gene in unrelated lines, which is usually taken as evidence for a signal of adaptive  
231 processes (12). We therefore tested if some genes were targeted by the 3044 observed non-  
232 synonymous and LOF mutations more frequently than expected by chance. We simulated the  
233 random occurrence of 3044 mutations along the genome, taking explicitly into account the  
234 differential mutation rates across the genome as inferred in **Figure 2B**, and we compared the  
235 simulated and observed numbers of genes targeted by these mutations (**Figure 3**). Non-  
236 synonymous and LOF mutations were analysed separately, and we categorized the genes in  
237 three groups: genes with at least one mutation in either i) CONTROL lines, ii) SEL lines, and  
238 iii) genes that mutated in both SEL and CONTROL lines. The analysis of non-synonymous  
239 mutations shows no departure from expectations in any category (**Figure 3A**), whereas we find  
240 more genes jointly targeted by LOF mutations between CONTROL and SEL line than expected  
241 (**Figure 3B**). Note that this excess might be due to hotspots for frameshift mutations like single  
242 sequence repeats (SSR) regions in the genome (13). More interestingly, we observe  
243 significantly fewer genes than expected to have been targeted by LOF mutations in SEL lines.  
244 In other words, LOF mutations are more clustered than expected by chance in SEL lines. We  
245 indeed find that there is a significant excess of genes that have been the target of 2 and of 3 or  
246 more LOF mutations in SEL lines (**Figure 3D**) and of 3 or more LOF mutations in CONTROL  
247 (**Figure 3F**). Note however, that there is no deviation from expected counts of mutations per  
248 gene for non-synonymous mutation (**Figure 3C, 3E**), such that only LOF mutations seem to  
249 preferentially accumulate in specific genes.

## 250 Enrichment of non-synonymous and LOF mutations in flagella genes

251 Since there is evidence that mutations in SEL and CONTROL lines are more clustered than  
252 expected, we then looked if there were any GO terms with significantly enriched numbers of

253 genes that have non-synonymous substitutions, frameshift mutations, or non-sense mutations.

254 We found 3 significant GO terms in SEL lines: taxis GO:0042330 (q-value =  $1.58 \cdot 10^{-4}$ ), amine

255 catabolic process GO:0009310 (q-value = 0.04), colonic acid biosynthetic process GO:0009242

256 (q-value = 0.04), and one significant GO terms in CONTROL lines: taxis GO:0042330 (q-value

257 = 0.004) (**Table S3**). Interestingly, the genes showing non-synonymous substitutions or LOF

258 mutation enrichment in our top GO term “taxis” are all involved in the formation of the flagella

259 (*fliG, fliM, fliN, fliO, motA, motB, fliJ*), and support the view that function of flagella is hindered

260 by these mutations. Indeed, several genes hit by non-synonymous substitutions or LOF

261 mutations are actively involved in the growth and assembly of the flagella. Nine genes have

262 mutations in both SEL and CONTROL groups, like the flagella hook protein *FlgE*, the protein

263 controlling flagella hook-substructure *FliK*, a protein that is involved in the assembly of the

264 flagellar motor *FlgG*, the protein which makes up the peptidoglycan ring of the flagellar basal

265 body *FlgI*, one of the components of the flagellar motor’s switch complex *FliM*, three

266 components of the flagellar export apparatus *FliI, FliO*, and *FliP*, and an element of the flagellar

267 motor complex *MotA* (**Table S4**). Focusing more generally on the 36 genes involved in the

268 formation of the flagella, we found 13 non-synonymous mutations, 3 synonymous mutations,

269 9 frameshifts in the CONTROL lines and 11 non-synonymous mutations, 2 synonymous

270 mutations, and 13 frameshifts in the SEL lines (**Table S4**), suggesting the occurrence of non-

271 or sub-functional flagella in 15 out of 20 CONTROL lines and in 16 out of 20 SEL lines. In

272 line with this observation, a motility test reveals that 14/20 CONTROL lines and all 20 SEL

273 lines have a reduced motility as compared to the ancestor line (**Figure S5**). Moreover, 8/20

274 CONTROL lines and 11/20 SEL lines have LOF mutations in flagella genes, but there is no

275 significant correlation between motility and number of LOF mutations in these genes (p-

276 value=0.3358).

277 Although there is no strong signal of adaptation when considering the dN/dS ratio at the whole

278 genome level (dN/dS = 1.06), we found quite high dN/dS ratios in flagella genes (CONTROL:

279 dN/dS = 2.369 [13 non-synonymous, 3 synonymous] p-value = 0.20; SEL: dN/dS = 3.007 [11  
280 non-synonymous, 2 synonymous] p-value = 0.16). Even though these ratios are not significant  
281 when analyzed separately in SEL and CONTROL lines due to the small total number of  
282 mutations, the dN/dS ratio is significant if we pool the two lines (dN/dS = 2.62, p-value = 0.05).  
283 These results suggest the occurrence of adaptive non-synonymous mutations in both conditions  
284 (SEL and CONTROL), and are in line with the previous observation that the colony size of  
285 CONTROL lines has initially increased before steadily decreasing over time (6). It appears that  
286 selection for flagella loss also occurred in SEL lines, but in addition, our results suggest that  
287 the LB medium is better exploited for the use of amino acids (amine catabolic process;  
288 GO:0009310) and that there is also a potential adaption to the environmental conditions in SEL  
289 lines by modifying the synthesis of the colanic acid (colonic acid biosynthetic process;  
290 GO:0009242).

291

## 292 Discussion

293 We compared *E. coli* colonies that expanded naturally on agar plates to colonies that were  
294 selected for fast expansion to see if the latter selection regime could counterbalance the  
295 accumulation of deleterious mutations occurring on the edge of the colonies during range  
296 expansions (6), and if yes, determine which molecular mechanisms were involved in that  
297 process. Indeed, we find that all 20 SEL lines that were repeatedly selected for being the furthest  
298 from their inoculation point have been able to increase their expansion speed over time, unlike  
299 most CONTROL lines (18/20), which showed a decreased expansion speed. Thus, despite  
300 having grown under the same conditions as the CONTROL lines, a simple form of artificial  
301 selection has allowed SEL lines to increase colony size by 130% compared to the ancestral line,  
302 corresponding to about 10% speed gain between each transfer.

303 Interestingly, SEL lines have on average the same number of mutations as CONTROL lines  
304 (**Figure 3**), implying that i) they have evolved for the same number of generations and ii) their  
305 fitness gain is not due to the purging of deleterious mutations or a selection for fewer harmful  
306 mutations, but that it is rather due to the selection of particularly beneficial mutations. Indeed,  
307 selection in SEL lines is imposed only during the transfer of the sample to a new plate (every ~  
308 127 generations), such that drift on the edge of the colonies should be as strong as in CONTROL  
309 lines. Therefore, the speed gain observed in SEL lines is due to the selection of clones present  
310 in fast growing sectors that overtook slow growing sectors where deleterious mutations were  
311 present. Indeed a small disadvantage of some sectors can lead to their loss on the expanding  
312 colony front, which tends to be occupied by the fastest growing colonies (14). The selection  
313 regime we have imposed thus seems to be akin to artificial spatial sorting (8), by which  
314 phenotypes with faster dispersal abilities colonizing the front are positively selected. Note that  
315 we observe however a saturation effect over time in both SEL and CONTROL lines, which is  
316 in line with Fisher's Geometric model (15, 16) predicting that the proportion of beneficial



317 mutations entering a population, and hence the potential for adaptation, is decreasing with the  
318 population's distance to the optimum (17). When the SEL lines get closer to their optimum, the  
319 proportion of new beneficial mutations is thus expected to decrease and hence the speed of  
320 adaptation goes down. Conversely, by accumulating deleterious mutations, the CONTROL  
321 lines are expected to have their fitness decrease and thus to be further from their optimum,  
322 allowing for a higher influx of beneficial mutations, and at the same time a decreasing  
323 expansion speed will allow selection to become more efficient and to better purge deleterious  
324 mutations (4).

325 We used the Elastic Net framework to evidence selection by finding genes where mutations had  
326 a significant impact on growth and by quantifying the effect size of these mutations in different  
327 genes. Interestingly, LOF mutations (frameshift and non-sense mutations) better explain colony  
328 size change than non-synonymous mutations or than considering LOF and non-synonymous  
329 mutations altogether. The average positive effect of mutations from the Elastic Net analysis is  
330 significantly larger than the average negative effect ( $p\text{-value} = 1.03 \times 10^{-7}$ ) (**Figure S4**). It  
331 implies that the beneficial mutation identified by the Elastic Net analysis have on average a  
332 greater impact on the colony size than the deleterious mutations, which makes sense since the  
333 mean fitness gain of SEL lines is larger than the fitness loss of CONTROL lines, despite both  
334 lines having accumulated about the same number of mutations.

335 Additionally, we find that LOF mutations have preferentially targeted a restricted set of genes  
336 in both CONTROL and SEL lines (**Figure 3B**), which is potentially due to hotspots for  
337 frameshift mutations in the genome like single sequence repeats (SSR). In agreement with this  
338 hypothesis, we find that 84% (CONTROL) and 86% (SEL) of frameshift mutations are in SSR  
339 regions that are known to be hypermutable sites (13). However, LOF mutations in the SEL lines  
340 are clustered in fewer genes than in the CONTROL lines suggesting they could still be the  
341 signature of convergent adaptive events. Several studies have proposed that SSR mutations

342 could act as a “switch” that can shut down genes (13, 18, 19). Interestingly, these frameshift  
343 LOF mutations in mononucleotide repeat regions are reversible, since back mutations can  
344 restore the original reading frame. Thus, this mechanism could provide an important source of  
345 variation that would increase the adaptative potential of bacterial populations. Worth of note,  
346 we find a significant enrichment of genes with high SSR density in GO terms that are involved  
347 in gene regulation and gene expression (**Table S5**). On the other hand, genes that have no SSR  
348 are enriched in GO terms involved in programmed cell death or other essential cellular and  
349 DNA replication functions such as transcription, translation, or protein disassembly (**Table S6**).  
350 These GO results suggest that there has been selection against SSRs in essential genes and  
351 positive selection for SSRs in regulatory genes. The combination of a high mutation rate and  
352 the possibility of back mutations in SSRs close to regulatory genes could lead to a faster  
353 adaptation to new conditions by modifying gene expression of non-essential genes, which  
354 would imply that the location of SSRs might have been under selection in *E. coli*.

355 Quite unexpectedly, we find that 4 out of 8 genes copies of the leucine tRNA have frameshift  
356 mutations that are associated to increased colony size (*leuP*, *leuV*, *leuQ*, and *leuT*) (**Table 1**).  
357 These tRNAs are all targeting the CUG codon, which is one of the most abundant codon used  
358 by *E. coli*. There are in total four copies of these tRNAs and there is not more than one mutation  
359 in these genes per line, implying that there is still a functional version of this tRNA present in  
360 each cell. It is likely that the mutations alter the structure of the tRNA, which in turn could  
361 affect the affinity of the tRNA to the amino acid. Interestingly, all 13 mutations found in leucine  
362 tRNA genes are in the acceptor stem that connects the tRNA to the amino acid. It has been  
363 shown that besides the anticodon loop the acceptor stem part is also important for the  
364 recognition of the amino acid (20). Altering the affinity of one of the 8 leucine tRNA copies  
365 could change bacterial fitness by changing the proportion of tRNAs that are connected to  
366 leucine since there would be a lower amount of functional tRNAs for leucine (21). Mutations  
367 in these tRNAs could thus optimize the level of rare and common leucine tRNAs that are

368 charged in the cells since it could lead to non-functional tRNAs and hence to a lower leucine  
369 tRNA level compared to other tRNAs. This suggests that these modified tRNAs could speed  
370 up protein production in SEL lines.

371 Also of interest, we find that non-synonymous mutations in the RNA polymerase (*rpoC*) lead  
372 to an important increase in colony size of SEL lines (**Table S3**), in line with previous studies  
373 showing that mutations in the RNA polymerase gene were adaptive for optimal growth (12,  
374 22). *rpoC* is part of the  $\beta'$  subunit of RNA polymerase, which is involved in the enzymatic  
375 function of the polymerase, especially at the promoter melting stage, and 4 out of 20 SEL strains  
376 show non-synonymous mutations in the  $\beta'$  *rpoC* subunit. In SEL lines, we found an enrichment  
377 for mutations in the GO term amine catabolic process (GO:0009310), which suggests that there  
378 has been an adaptation to the LB medium since this medium is rich in oligopeptides. *E. coli*  
379 indeed has several oligopeptidases and peptidases, enabling it to recover free amino acids from  
380 many oligopeptides (23). There is also an enrichment of non-synonymous and LOF mutations  
381 in colanic acid biosynthetic genes in SEL lines (GO:0009242). Colanic acid is a negatively  
382 charged polymer of glucose, galactose, fructose, and glucuronic acid that forms a protective  
383 capsule surrounding the bacterial cell surface. Previous studies have shown that colanic acid  
384 synthesis is upregulated in biofilms and that it has a potential protective function in hostile  
385 environments (24, 25). Alternatively, since the production of these genes is costly, loss of  
386 function mutations could lower these costs (26), potentially allowing bacteria to grow faster.

387 Both CONTROL lines and SEL lines have more mutations suggestive of adaptation in the taxis  
388 GO term (GO:0042330). This potentially adaptive mutations could explain the initial fitness  
389 increase of the CONTROL lines that was described previously (6). The mutations connected to  
390 the taxis GO term are in genes that are components of the flagellum. LOF mutations in flagella  
391 genes could lower the cost of production of flagella.. In addition, bacteria with deficient or  
392 absent flagella could more easily invade the edge of the colony due to a cell sorting mechanism

393 like that recently shown for bacteria with lower pili density (9). In that case, flagella-deficient  
394 bacteria would not have any particular growth or reproductive advantage, but they would just  
395 more easily disperse and invade the wave front. However, recent studies have shown that  
396 flagella has an architectural function within biofilms, as they are expressed at the front of the  
397 bacterial colony and tether cells together in a mesh (27). All SEL lines and 14/20 CONTROL  
398 lines show a reduced flagellum functionality, but not a complete loss of motility. Further studies  
399 would thus be necessary to investigate the exact impact of altered flagella genes on the colony  
400 structure and expansion speed.

401 LOF mutations are generally considered as important for adaptive processes in bacteria (26,  
402 28), and we provide here evidence that they play a key role in the increased expansion speed of  
403 SEL lines. We observed many SSR LOF mutation in genes involved in gene regulation and  
404 gene expression, as well as several non-synonymous mutations in the RNA polymerase gene  
405 that is also influencing gene regulation. It suggests that the observed differences between SEL  
406 and CONTROL lines are mainly due to a combination of shutting down expensive genes and  
407 modified gene expression leading to faster growth. Overall, our detailed genomic analyses,  
408 which have allowed us to reveal the exact genetic mechanisms involved in the control of  
409 bacterial expansions, suggest that SSR LOF mutations could have been selected to act as  
410 reversible gene switches and expression modulator, allowing bacteria to quickly adapt to a  
411 variety of situations that extend much beyond mere range expansions.

412

## 413 Methods

### 414 Bacterial strain

415 We used *E. coli* K12 MG 1655 mutator strains where the expression of the *mutS* gene is directly  
416 controlled by the arabinose promoter *pBAD* inserted in front of the *mutS* gene. In absence of  
417 arabinose, *mutS* is not expressed, leading to a higher spontaneous mutation rate due to the  
418 inactivation of the methyl-directed mismatch repair system (29). Bacteria grown in presence of  
419 arabinose express the *mutS* gene and thus have a lower spontaneous mutation rate. This feature  
420 was used to prevent accumulation of mutations during bacterial manipulations performed  
421 outside evolutionary experiments. Additionally, our strain includes a GFP marker located in the  
422 lac operon, which can be induced by Isopropyl  $\beta$ -D-1-thiogalactopyranoside (IPTG).

### 423 Experimental setup

424 Bacterial strains were grown on LB agar plates at 37°C for a total duration of 39 days. The  
425 strains were transferred on new agar plates every 3 days. An image of the colony was taken  
426 before transferring the strains to a new plate. At each transfer, 100 million cells were sampled  
427 from the colony front using a sterile pipette tip and resuspended in 100  $\mu$ l 0.85% NaCl solution.  
428 One million cells were then used to inoculate a new plate (**Figure 1A**). We used two different  
429 sampling protocols. 1) No selection (CONTROL): we drew a line from the centre of the plate  
430 to the edge before the plate was inoculated, and after three days of growth, bacteria were  
431 sampled at the point of contact of the line and the colony. 2) Artificial selection (SEL): we let  
432 the bacteria grow for 3 days, and the edge of the furthest expanding sector of the colony was  
433 sampled (**Figure 4B**). The artificial selection experiment was performed on 20 SEL lines, which  
434 were then compared to 20 CONTROL lines randomly selected from a previous experiment (6). In both  
435 cases, 13 transfers were performed for each line in a period of 39 days (**Figure 4C**).

436

437

#### 438 DNA extraction

439 After the range expansion experiment, one million cells from the wave front were streaked out  
440 on an LB agar plate containing 0.5% arabinose and incubated for 24h at 37°C to isolate single  
441 clones. A single colony was dissolved in 100 µl dilution solution (0.85% NaCl) and 1 µl was  
442 transferred to a new LB agar plate containing 0.5% arabinose. The plate was then incubated for  
443 24h at 37°C. Then, the entire colony was removed from the agar plate and resuspended in 1 ml  
444 dilution solution. Genomic DNA was extracted using the Wizard Genomic DNA Purification  
445 Kit (Promega) following the manufacturer protocol. The integrity of the DNA was checked by  
446 gel electrophoresis. The DNA concentration was determined by fluorometric quantification  
447 (Qubit 2.0).

#### 448 Whole genome sequencing and variant calling

449 Twenty SEL lines selected for fast expanding speed were sequenced using a TruSeq DNA PCR-  
450 Free library (Illumina) on a HiSeq 3000 platform (Illumina), from which we obtained 100bp  
451 end reads for all samples. Trimmomatic 0.32 (30) was used to remove the adapter sequences  
452 from the reads and for quality trimming. Leading and trailing bases with quality below 3 were  
453 removed. The reads were scanned with a 4bp sliding window, and cut if the average quality per  
454 base was below 15. Reads with a length below 36 were excluded from the analysis. Variants  
455 were identified using BRESEQ, a computational tool for analyzing short-read DNA data (31).  
456 The reads were mapped to the *E. coli* K12 MG1655 reference genome (NC\_000913.3)

#### 457 Estimation of dN/dS ratio

458 The synonymous and non-synonymous substitutions in each line were counted. The dN/dS ratio  
459 was computed by taking the expected number of synonymous and non-synonymous  
460 substitutions into account if all codon positions in the reference genome would mutate.

461

462 Expansion velocity on agar plate

463 Images of the colony were taken during the experiments on agar plates (n=20 for CONTROL  
 464 lines, n=20 for SEL lines) before transferring the cells to a new plate. We took a picture every  
 465 three days for each line, and thus have a total of 13 pictures for each line. The images were  
 466 analyzed with the Fiji package of the imageJ software (32). The radius of the colony was  
 467 measured and plotted against time. The change in expansion velocity was then determined by  
 468 fitting a mixed-effect linear model to the data. The observations were arranged in a one-way  
 469 classification. This means that data were grouped by the 20 samples that were repeatedly  
 470 measured over time. This model assumes that the growth rate of all lines changes due to a fixed  
 471 effect  $\beta$  common to all lines, but it considers line-specific variability in growth rates by  
 472 including random effects  $\mathbf{b}_i$  for the intercept and slope for the  $i$ -th line, as:

$$473 \quad \mathbf{y}_i = \mathbf{X}_i \boldsymbol{\beta} + \mathbf{Z}_i \mathbf{b}_i + \boldsymbol{\varepsilon}_i$$

$$474 \quad \mathbf{b}_i \sim N(\mathbf{0}, \boldsymbol{\Psi})$$

$$475 \quad \boldsymbol{\varepsilon}_i \sim N(\mathbf{0}, \sigma^2 \mathbf{I})$$

$$476 \quad i = 1, \dots, 20$$

477 where  $\mathbf{X}_i$  and  $\mathbf{Z}_i$  are known fixed effect and random effect regressor matrices,  $\boldsymbol{\varepsilon}_i$  is the within  
 478 group error with a Gaussian distribution, and  $\boldsymbol{\Psi}$  is the variance-covariance matrix of the random  
 479 effects. Two nested models were compared with a likelihood-ratio test. The first linear model  
 480 is defined as

$$481 \quad \begin{bmatrix} y_{i,1} \\ \vdots \\ y_{i,13} \end{bmatrix} = \begin{bmatrix} 1 & x_1 \\ \vdots & \vdots \\ 1 & x_{13} \end{bmatrix} \begin{bmatrix} \beta_0 \\ \beta_1 \end{bmatrix} + \begin{bmatrix} 1 & x_1 \\ \vdots & \vdots \\ 1 & x_{13} \end{bmatrix} \begin{bmatrix} b_{i,1} \\ b_{i,2} \end{bmatrix} + \begin{bmatrix} \varepsilon_{i,1} \\ \vdots \\ \varepsilon_{i,13} \end{bmatrix},$$

482 whereas the second model includes an additional quadratic term ( $\beta_2$ ) for fixed effects, as

$$483 \quad \begin{bmatrix} y_{i,1} \\ \vdots \\ y_{i,13} \end{bmatrix} = \begin{bmatrix} 1 & x_1 & x_1^2 \\ \vdots & \vdots & \vdots \\ 1 & x_{13} & x_{13}^2 \end{bmatrix} \begin{bmatrix} \beta_0 \\ \beta_1 \\ \beta_2 \end{bmatrix} + \begin{bmatrix} 1 & x_1 \\ \vdots & \vdots \\ 1 & x_{13} \end{bmatrix} \begin{bmatrix} b_{i,1} \\ b_{i,2} \end{bmatrix} + \begin{bmatrix} \varepsilon_{i,1} \\ \vdots \\ \varepsilon_{i,13} \end{bmatrix}.$$

484 Determining important genes for expansion speed by shrinkage methods

485 The mixed effect model from the expansion velocity analysis was used to predict the colony  
486 size after 39 days. The data were first log-transformed as

$$487 \quad x' = \log\left(\frac{x_{39}}{x_0}\right)$$

488 where  $x_{39}$  is the predicted colony size at day 39 and  $x_0$  is the predicted initial colony size at the  
489 start of the experiment. A value of 0 indicates that the colony size stays at the same level,  
490 positive values indicate an increase, and negative values a decrease in colony size.

491 For each bacterial line, we counted all non-synonymous, frameshift, and nonsense mutations  
492 for each gene. The elastic net method implemented in the R package `glmnet` was used to fit a  
493 Gaussian model to the data. Elastic net is a modification of linear regression that imposes a  
494 penalty on the magnitude of the coefficients. Roughly speaking, we performed a linear  
495 regression where we forced the estimated parameters to be small via a penalty that is  
496 proportional to the sum of the absolute values of the estimated parameters of the linear  
497 regression model to avoid overfitting. Avoiding overfitting is particularly important if the  
498 number of response variables is large relative to the number of data points. The penalty is  
499 controlled by the regularization parameter  $\lambda$ , whose value was chosen by 3-fold cross-validation  
500 using the `cv.glmnet` function of the `glmnet` package. Elastic net is a combination of two model  
501 choice methods, namely ridge regression and LASSO (33). The elastic net penalty is controlled  
502 by the parameters  $\alpha$  where  $\alpha = 0$  corresponds to LASSO and  $\alpha = 1$  to ridge regression.

$$503 \quad \beta^{ridge} = \operatorname{argmin}_{\beta} \left( \sum_{i=1}^N \left( y_i - \beta_0 - \sum_{j=1}^p x_{ij} \beta_j \right)^2 + \lambda \sum_{j=1}^p \beta_j^2 \right)$$

504

$$505 \quad \beta^{lasso} = \operatorname{argmin}_{\beta} \left( \sum_{i=1}^N \left( y_i - \beta_0 - \sum_{j=1}^p x_{ij} \beta_j \right)^2 + \lambda \sum_{j=1}^p |\beta_j| \right) \quad (\text{Tibshirani 1996})$$

$$506 \quad \beta^{elastic\ net} = \operatorname{argmin}_{\beta} \left( \sum_{i=1}^N \left( y_i - \beta_0 - \sum_{j=1}^p x_{ij} \beta_j \right)^2 + \lambda \sum_{j=1}^p (\alpha \beta_j^2 + (1 - \alpha) |\beta_j|) \right) \quad (\text{Zou et al. 2005})$$

507



508

## 509 Distribution of mutations on the bacterial genome

510 In order to determine signals of convergent adaptation we were searching for mutations that  
511 have targeted the same gene in unrelated lines. We calculated the distribution of mutations on  
512 the bacterial genome by assignig the 4530 observed SNPs that accumulated in CONTROL lines  
513 into 100 equal-sized bins, where each bin was approximately 50 kb in size (**Figure S1**). A  
514 Morlet wavelet power spectrum was computed with the *analyze.wavelet* function of the  
515 WaveletComp R package. The extracted power levels were used to reconstruct the mutation  
516 pattern over the genome by applying the *reconstruct* function of the Wavelet package, and we  
517 extracted the probability  $P_{hit}(i)$  that a gene  $i$  is hit by a mutation. We simulated the same number  
518 of mutations as we found non-synonymous substitutions and synonymous substitutions in the  
519 CONTROL and SEL lines by generating multinomially distributed random number vectors  
520 with a length of the total numbers of genes and the probabilities that we determined by the  
521 wavelet analysis. We simulated this vector 1000 times and we calculated the mean value as well  
522 as the 2.5% and 97.5% quantiles from the simulated data and compared to the observed  
523 CONTROL and SEL data.

## 524 Distribution of simple sequence repeats (SSR) on the bacterial genome

525 All simple sequence repeats (SSRs) longer than 5 nucleotides were extracted from the *E. coli*  
526 K12 MG1655 reference genome (NC\_000913.3). For the SSRs that were located in coding  
527 regions, the gene of residence was determined. To test whether the SSRs are enriched in specific  
528 pathways or functions of the bacterial cell, two subsets of genes were considered: i) a list of  
529 genes that do not have any SSR with a length larger or equal 5, and ii) the top 10% of genes  
530 with the highest density of SSR. The density of the SSRs in a certain gene was determined by  
531 taking the number of SSRs with a length larger or equal to 5 in the gene and dividing it by the

532 length of the gene. A gene ontology term enrichment analysis was performed using the topGO  
533 package for R (34).

#### 534 Gene ontology enrichment test

535 In the gene ontology (GO) enrichment analysis, we only used non-synonymous, frameshift and  
536 nonsense mutations. The test was performed with the topGO package for R (34). In the GO  
537 enrichment analysis, we specifically use information on the number of mutations having  
538 occurred in each gene. For any gene the probability from the wavelet analysis that it is hit by a  
539 mutation was used to perform a one-tailed binomial test to calculate for any given gene if the  
540 observed number of mutations deviated from the expected number. The resulting list of  
541 significant genes was used to perform a Fisher's exact test to determine significantly over-  
542 represented GO terms. The *weight01* algorithms used in the topGo analysis iteratively removes  
543 the genes mapped to significant GO terms from higher level GO terms and the significance  
544 score of connected nodes are compared to detect the locally most significant terms in the GO  
545 graph by down-weighting genes in less significant neighbors. Separate analyses were done on  
546 CONTROL (n =20) and SEL (n = 20) lines.

#### 547 Motility test

548 20 CONTROL and 20 SEL lines were incubated in LB medium with addition of 0.2 % arabinose  
549 at 37°C for 24h. The cultures were diluted to an optical density (OD600) of 0.8 with 0.85%  
550 NaCl solution. 2.5 ul of the bacterial suspension was transferred to a LB agar plate with 0.3%  
551 agar. The plates were incubated for 18h at 37C°. The tested line is motile if the growth is  
552 radiating away from the central inoculation point (35).

553

## 554 Acknowledgments

555 We are grateful to Tosso Leeb, Cord Drögemüller and the NGS core facility of the University of Berne  
556 for their support.

557

## 558 References

- 559 1. Travis JM, Munkemuller T, Burton OJ, Best A, Dytham C, Johst K. Deleterious mutations can  
560 surf to high densities on the wave front of an expanding population. *Mol Biol Evol.* 2007;24(10):2334-  
561 43.
- 562 2. Hallatschek O, Nelson DR. Life at the front of an expanding population. *Evolution.*  
563 2010;64(1):193-206.
- 564 3. Peischl S, Dupanloup I, Kirkpatrick M, Excoffier L. On the accumulation of deleterious  
565 mutations during range expansions. *Mol Ecol.* 2013;22(24):5972–82.
- 566 4. Peischl S, Excoffier L. Expansion load: recessive mutations and the role of standing genetic  
567 variation. *Mol Ecol.* 2015;24(9):2084–94.
- 568 5. Peischl S, Kirkpatrick M, Excoffier L. Expansion load and the evolutionary dynamics of a  
569 species range. *Am Nat.* 2015;185(4):E81-93.
- 570 6. Bosshard L, Dupanloup I, Tenaillon O, Bruggmann R, Ackermann M, Peischl S, et al.  
571 Accumulation of Deleterious Mutations During Bacterial Range Expansions. *Genetics.*  
572 2017;207(2):669-84.
- 573 7. Phillips BL, Brown GP, Webb JK, Shine R. Invasion and the evolution of speed in toads.  
574 *Nature.* 2006;439(7078):803-.
- 575 8. Shine R, Brown GP, Phillips BL. An evolutionary process that assembles phenotypes through  
576 space rather than through time. *Proc Natl Acad Sci U S A.* 2011;108(14):5708-11.
- 577 9. Oldewurtel ER, Kouzel N, Dewenter L, Henseler K, Maier B. Differential interaction forces  
578 govern bacterial sorting in early biofilms. *Elife.* 2015;4.
- 579 10. Xie ZJ, Wong H, Ip WC. Wavelets in probability and statistics - A review in recent advances.  
580 *Chinese Sci Bull.* 2002;47(9):705-16.
- 581 11. Zou H, Hastie T. Regularization and variable selection via the elastic net. *J Roy Stat Soc B.*  
582 2005;67:301-20.
- 583 12. Tenaillon O, Rodriguez-Verdugo A, Gaut RL, McDonald P, Bennett AF, Long AD, et al. The  
584 molecular diversity of adaptive convergence. *Science.* 2012;335(6067):457-61.
- 585 13. Mrazek J. Analysis of distribution indicates diverse functions of simple sequence repeats in  
586 *Mycoplasma* genomes. *Mol Biol Evol.* 2006;23(7):1370-85.
- 587 14. Korolev KS, Muller MJ, Karahan N, Murray AW, Hallatschek O, Nelson DR. Selective sweeps in  
588 growing microbial colonies. *Physical biology.* 2012;9(2):026008.
- 589 15. Tenaillon O. The Utility of Fisher's Geometric Model in Evolutionary Genetics. *Annu Rev Ecol*  
590 *Evol S.* 2014;45:179-201.
- 591 16. Fisher RA. *The Genetical Theory of Natural Selection.* Oxford, UK: Oxford University Press;  
592 1930.
- 593 17. Martin G, Elena SF, Lenormand T. Distributions of epistasis in microbes fit predictions from a  
594 fitness landscape model. *Nat Genet.* 2007;39(4):555-60.
- 595 18. Moxon R, Bayliss C, Hood D. Bacterial contingency loci: The role of simple sequence DNA  
596 repeats in bacterial adaptation. *Annu Rev Genet.* 2006;40:307-33.
- 597 19. Kashi Y, King DG. Simple sequence repeats as advantageous mutators in evolution. *Trends in*  
598 *Genetics.* 2006;22(5):253-9.
- 599 20. Jahn M, Rogers MJ, Soll D. Anticodon and Acceptor Stem Nucleotides in Transfer RnagIn Are  
600 Major Recognition Elements for Escherichia-Coli Glutamyl-Transfer Rna-Synthetase. *Nature.*  
601 1991;352(6332):258-60.
- 602 21. Ling JQ, O'Donoghue P, Soll D. Genetic code flexibility in microorganisms: novel mechanisms  
603 and impact on physiology. *Nat Rev Microbiol.* 2015;13(11):707-21.
- 604 22. Conrad TM, Frazier M, Joyce AR, Cho BK, Knight EM, Lewis NE, et al. RNA polymerase  
605 mutants found through adaptive evolution reprogram Escherichia coli for optimal growth in minimal  
606 media. *Proc Natl Acad Sci U S A.* 2010;107(47):20500-5.
- 607 23. Sezonov G, Joseleau-Petit D, D'Ari R. Escherichia coli physiology in Luria-Bertani broth. *J*  
608 *Bacteriol.* 2007;189(23):8746-9.

- 609 24. Danese PN, Pratt LA, Kolter R. Exopolysaccharide production is required for development of  
610 Escherichia coli K-12 biofilm architecture. *J Bacteriol.* 2000;182(12):3593-6.
- 611 25. Prigent-Combaret C, Prensier G, Le Thi TT, Vidal O, Lejeune P, Dorel C. Developmental  
612 pathway for biofilm formation in curli-producing Escherichia coli strains: role of flagella, curli and  
613 colanic acid. *Environ Microbiol.* 2000;2(4):450-64.
- 614 26. Hottes AK, Freddolino PL, Khare A, Donnell ZN, Liu JC, Tavazoie S. Bacterial Adaptation  
615 through Loss of Function. *Plos Genetics.* 2013;9(7).
- 616 27. Serra DO, Richter AM, Klauck G, Mika F, Hengge R. Microanatomy at cellular resolution and  
617 spatial order of physiological differentiation in a bacterial biofilm. *MBio.* 2013;4(2):e00103-13.
- 618 28. Kvitek DJ, Sherlock G. Whole Genome, Whole Population Sequencing Reveals That Loss of  
619 Signaling Networks Is the Major Adaptive Strategy in a Constant Environment. *Plos Genetics.*  
620 2013;9(11).
- 621 29. Yang W, Junop MS, Ban C, Obmolova G, Hsieh P. DNA mismatch repair: from structure to  
622 mechanism. *Cold Spring Harb Symp Quant Biol.* 2000;65:225-32.
- 623 30. Bolger AM, Lohse M, Usadel B. Trimmomatic: a flexible trimmer for Illumina sequence data.  
624 *Bioinformatics.* 2014;30(15):2114-20.
- 625 31. Deatherage DE, Barrick JE. Identification of mutations in laboratory-evolved microbes from  
626 next-generation sequencing data using breseq. *Methods Mol Biol.* 2014;1151:165-88.
- 627 32. Schindelin J, Arganda-Carreras I, Frise E, Kaynig V, Longair M, Pietzsch T, et al. Fiji: an open-  
628 source platform for biological-image analysis. *Nature methods.* 2012;9(7):676-82.
- 629 33. Tibshirani R. Regression shrinkage and selection via the Lasso. *J Roy Stat Soc B Met.*  
630 1996;58(1):267-88.
- 631 34. Alexa A, Rahnenfuhrer J, Lengauer T. Improved scoring of functional groups from gene  
632 expression data by decorrelating GO graph structure. *Bioinformatics.* 2006;22(13):1600-7.
- 633 35. Tittsler RP, Sandholzer LA. The use of semi-solid agar for the detection of bacterial motility.  
634 *Journal of Bacteriology.* 1936;31(6):575-80.
- 635
- 636

637 **Figure 1:** Evolution of colony size after 3 days of growth on LB agar plates. Blue: CONTROL  
638 lines, red: SEL lines. The x axis represents the total days of evolution. The horizontal dashed  
639 lines represent the average colony size measured in the first 3 days of the experiment over all  
640 SEL and CONTROL lines. Solid lines represent the line specific regression lines from the  
641 mixed-effect regression analysis.

642 **Figure. 2:** **A)** Number of mutations after 39 days of expansion blue: CONTROL lines, red:  
643 SELECTED lines. The variance in the number of mutations is significantly different (Bartlett  
644 test of homogeneity of variance: p-value= 0.048) **B)** Distribution of SEL and CONTROL  
645 mutations along the genome. The origin of the genome replication is indicated as oriC, red line:  
646 Wavelet transformation of the distribution of the mutations

647 **Figure 3.** Distribution of mutations among genes. **A, B:** Number of genes with at least one  
648 mutation in either CONTROL or SEL lines, and number of genes that mutated in the SEL and  
649 the CONTROL experiment (INT). Whiskers indicate limits of empirical 95% CI computed  
650 from 1000 simulations. Grey bars: expected numbers. Color bars: observed numbers **A:** non-  
651 synonymous mutations **B:** LOF mutation. **C-F:** Number of genes with a given number of  
652 mutations in SEL and CONTROL experiments. **C, E:** Genes with non synonymous mutations,  
653 **D, F:** Genes with LOF mutation. Blue: CONTROL lines, orange: SEL lines, violet: CONTROL  
654 lines and SEL lines

655 **Figure 4** Experimental setup. **A)** ~100 million bacteria were sampled after 3 days of growth on  
656 the edge of the colony and diluted in 100 µl LB medium and one million bacteria were  
657 transferred to a new agar plate for a new growth cycle. **B)** Two sampling protocols were used:  
658 No selection (CONTROL) we drew a line from the centre of the plate to the edge before the  
659 plate was inoculated, and after three days of growth, bacteria were sampled at the point of  
660 contact of the line and the colony and artificial selection (SEL): we let the bacteria grow for 3  
661 days, and the edge of the furthest expanding sector of the colony was sampled. **C)** E. coli lines  
662 were grown agar plates for a total of 39 days (1650 generation) with two different sampling  
663 protocols: Random sampled and selected for fast expansion.

664 **Figure S1:** Distribution of mutations on the genome in SEL and CONTROL lines. The position of the  
665 origin of replication is indicated by a dashed line. Blue: CONTROL lines, Orange: SEL lines, dark  
666 red: overlap of CONTROL and SEL lines

667 **Figure S2:** Genes showing multiple mutations in **A:** SEL lines (red). and **B:** CONTROL lines (blue).  
668 The number of mutations in a gene is indicated by the intensity of the color.

669 **Figure S3:** Motility experiment. Blue: CONTROL lines, Red: SEL lines. The identifier of the  
670 CONTROL and the SEL lines are indicated in the plot. The y axis indicates the distance that the lines  
671 travelled in 24 h. The dashed gray line indicates the expansion distance of the ancestor line.

672 **Figure S4:** Coefficients of the elastic net analysis. Blue: genes where a mutation leads to a decrease in  
673 colony size. Red: genes where a mutation leads to an increase in colony size.

674 **Figure S5:** Mosaic Plot of the number of significant genes from the Elastic Net analysis .The gene  
675 function group are indicated at the top. Red: Genes where a mutation leads to an increase in colony size.

676 Blue: Genes where a mutation leads to a decrease in colony size. The areas are proportional to the  
677 number genes in the group combination.

678 **Table S1:** Coefficients inferred by elastic net regression. The coefficients represents the effects of  
679 mutations on bacterial growth and are relative to the initial colony size. Only non-synonymous  
680 mutations were used for the analysis. Orange: genes that have mutations in SEL lines, blue: genes that  
681 have mutations in CONTROL lines.

682 **Table S2** Coefficients inferred by elastic net regression. The coefficients represents the effects of  
683 mutations on bacterial growth and are relative to the initial colony size. Only Frame shift and non-  
684 sense mutations were used for the analysis. Orange: genes that have mutations in SEL lines, blue:  
685 genes that have mutations in CONTROL lines, violet: genes that have mutations in both CONTROL  
686 and SEL lines.

687 **Table S3:** GO enrichment. Only non-synonymous, frame shift, and nonsense mutations were used for  
688 the analysis. The highlighted GO terms represent significant terms after correction for multiple testing  
689 (FDR). Orange: SEL lines. Blue: CONTROL lines.

690 **Table S4:** Mutations in SEL and CONTROL lines. An asterisk (\*) indicates genes associated with the  
691 “taxi” GO term. Highlighted genes are mutated in both conditions.

692 **Table S5:** GO enrichment analysis using the top 10% of genes with the highest density of SSRs with a  
693 length larger or equal 5.

694 **Table S6:** GO enrichment analysis with genes that do not have any SSRs with a length larger or equal  
695 5.

696

log colony size [mm]

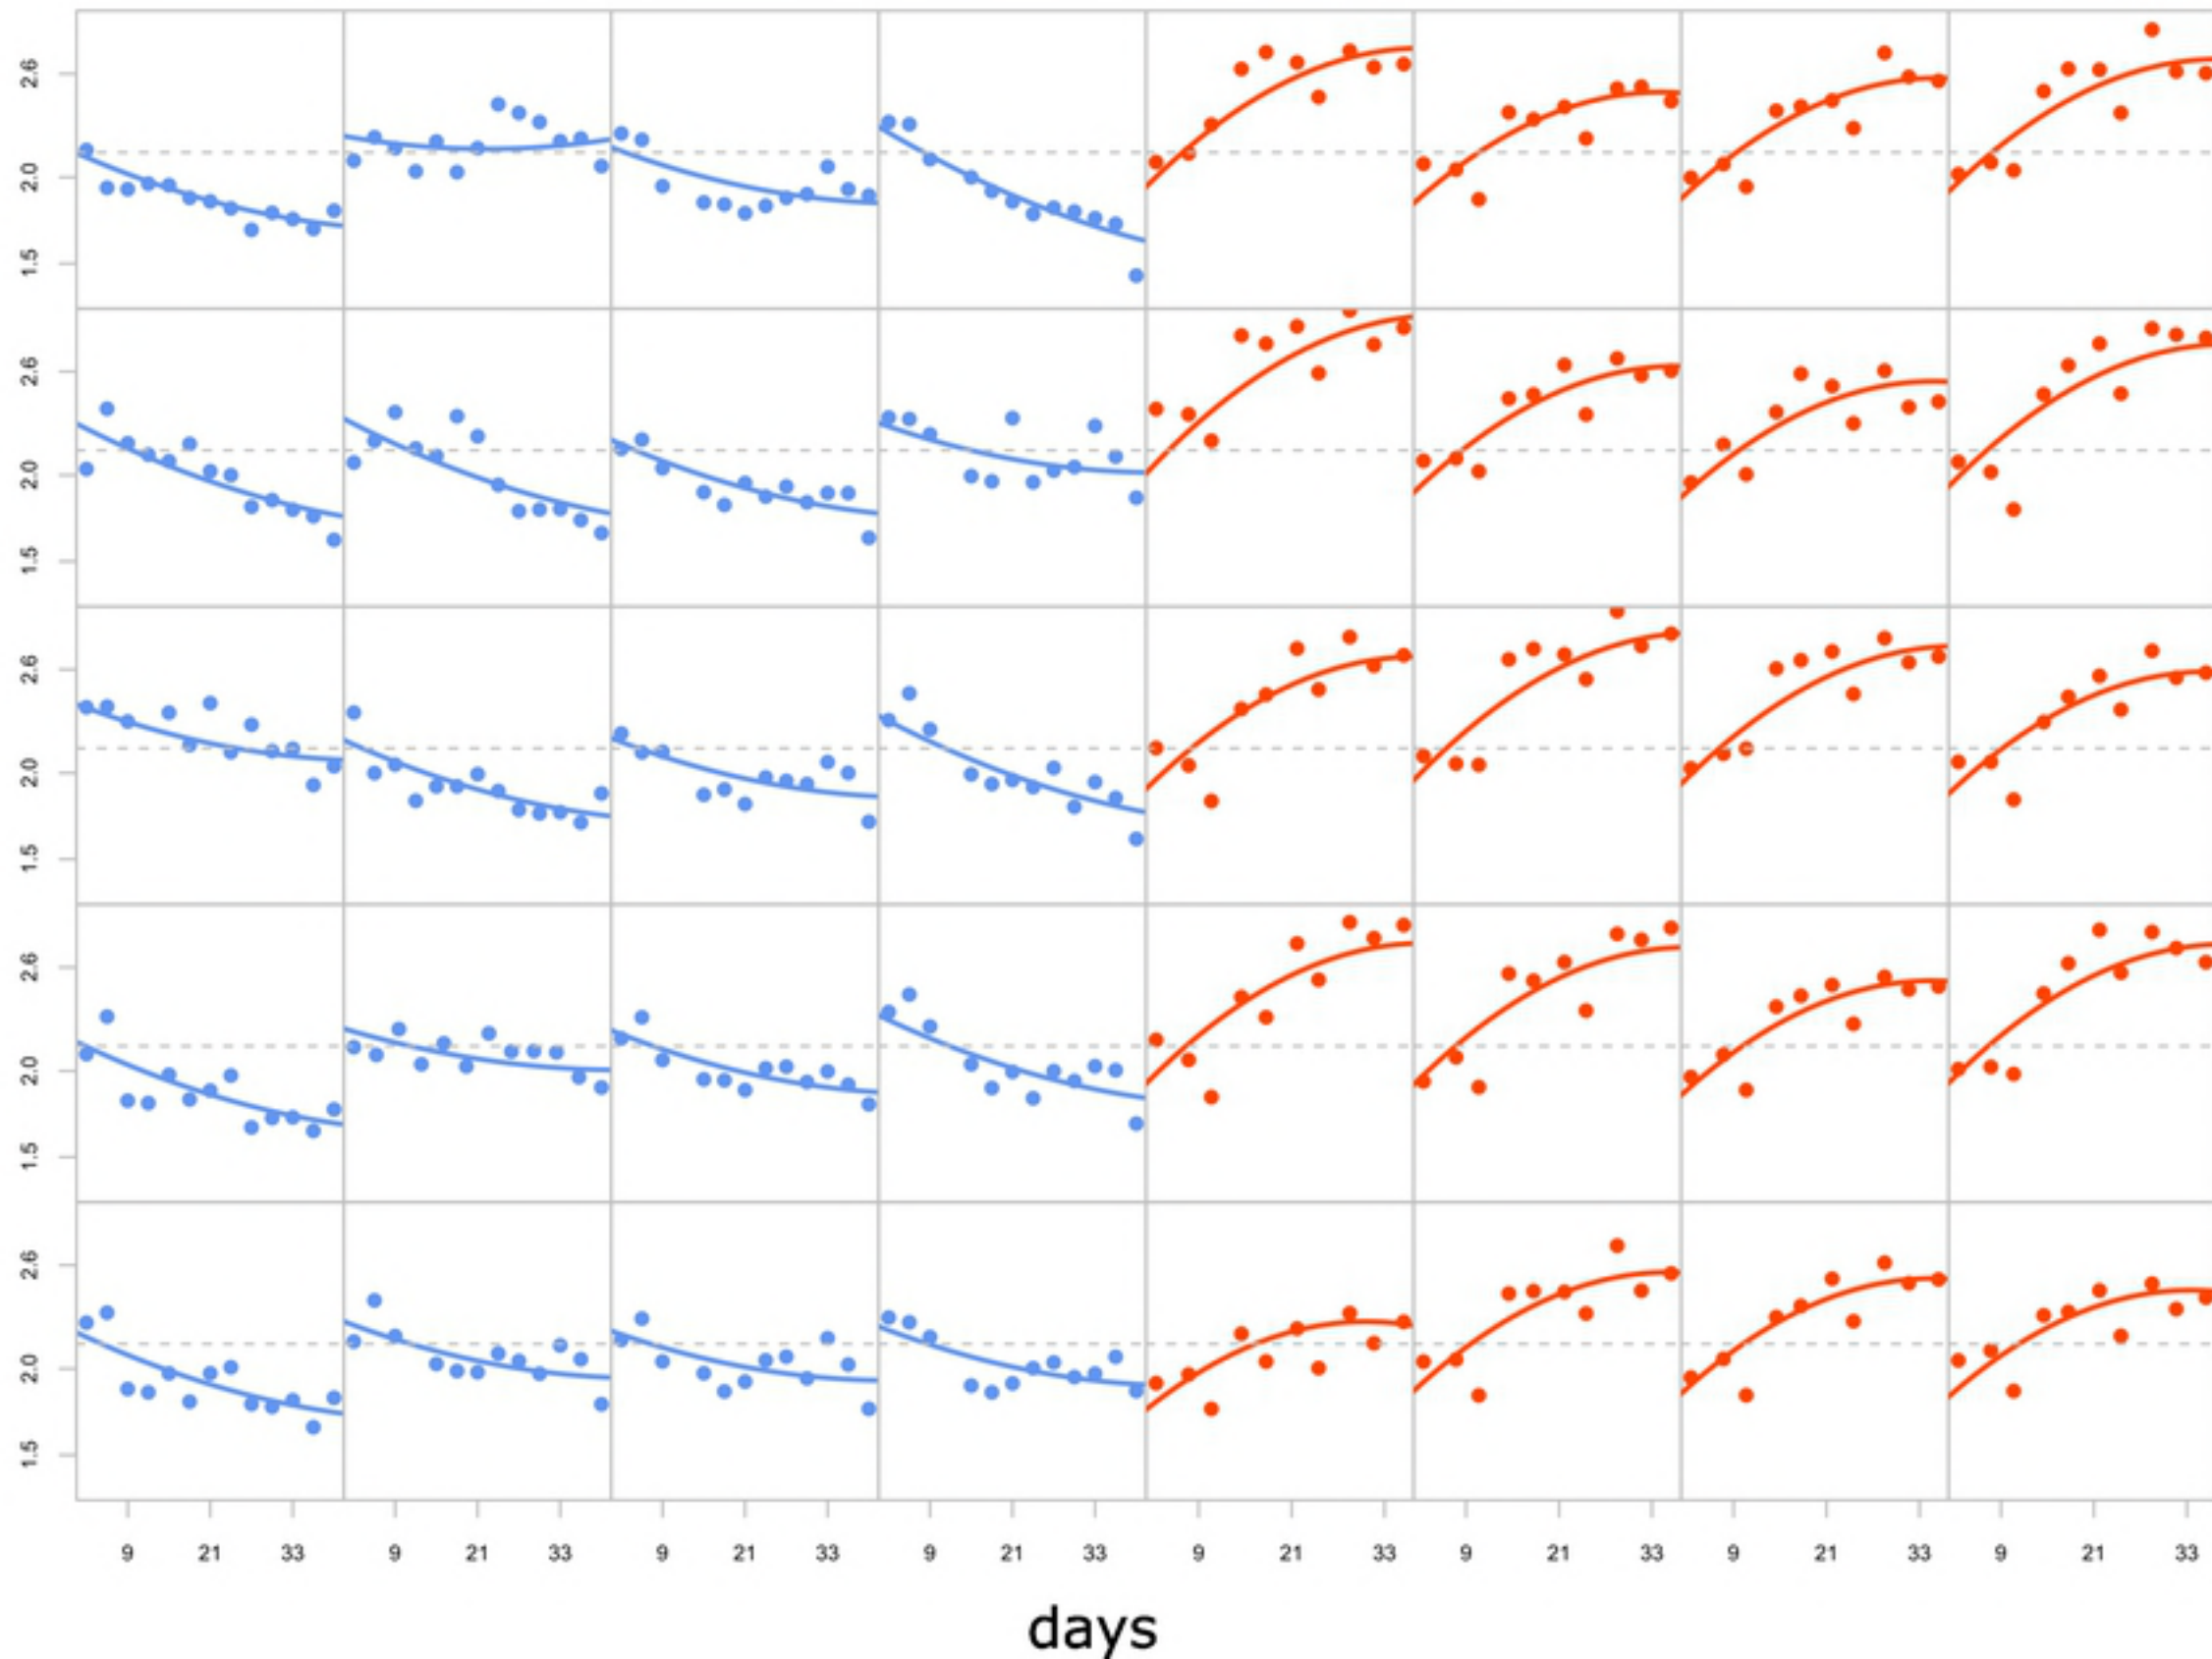



**A**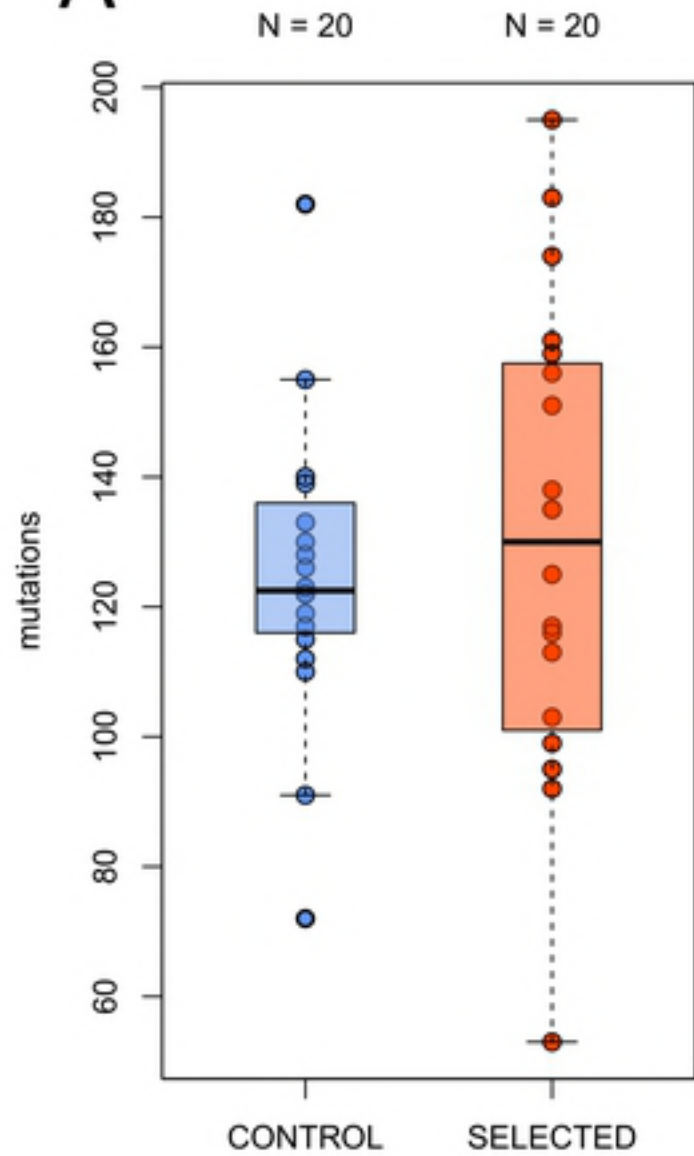**B**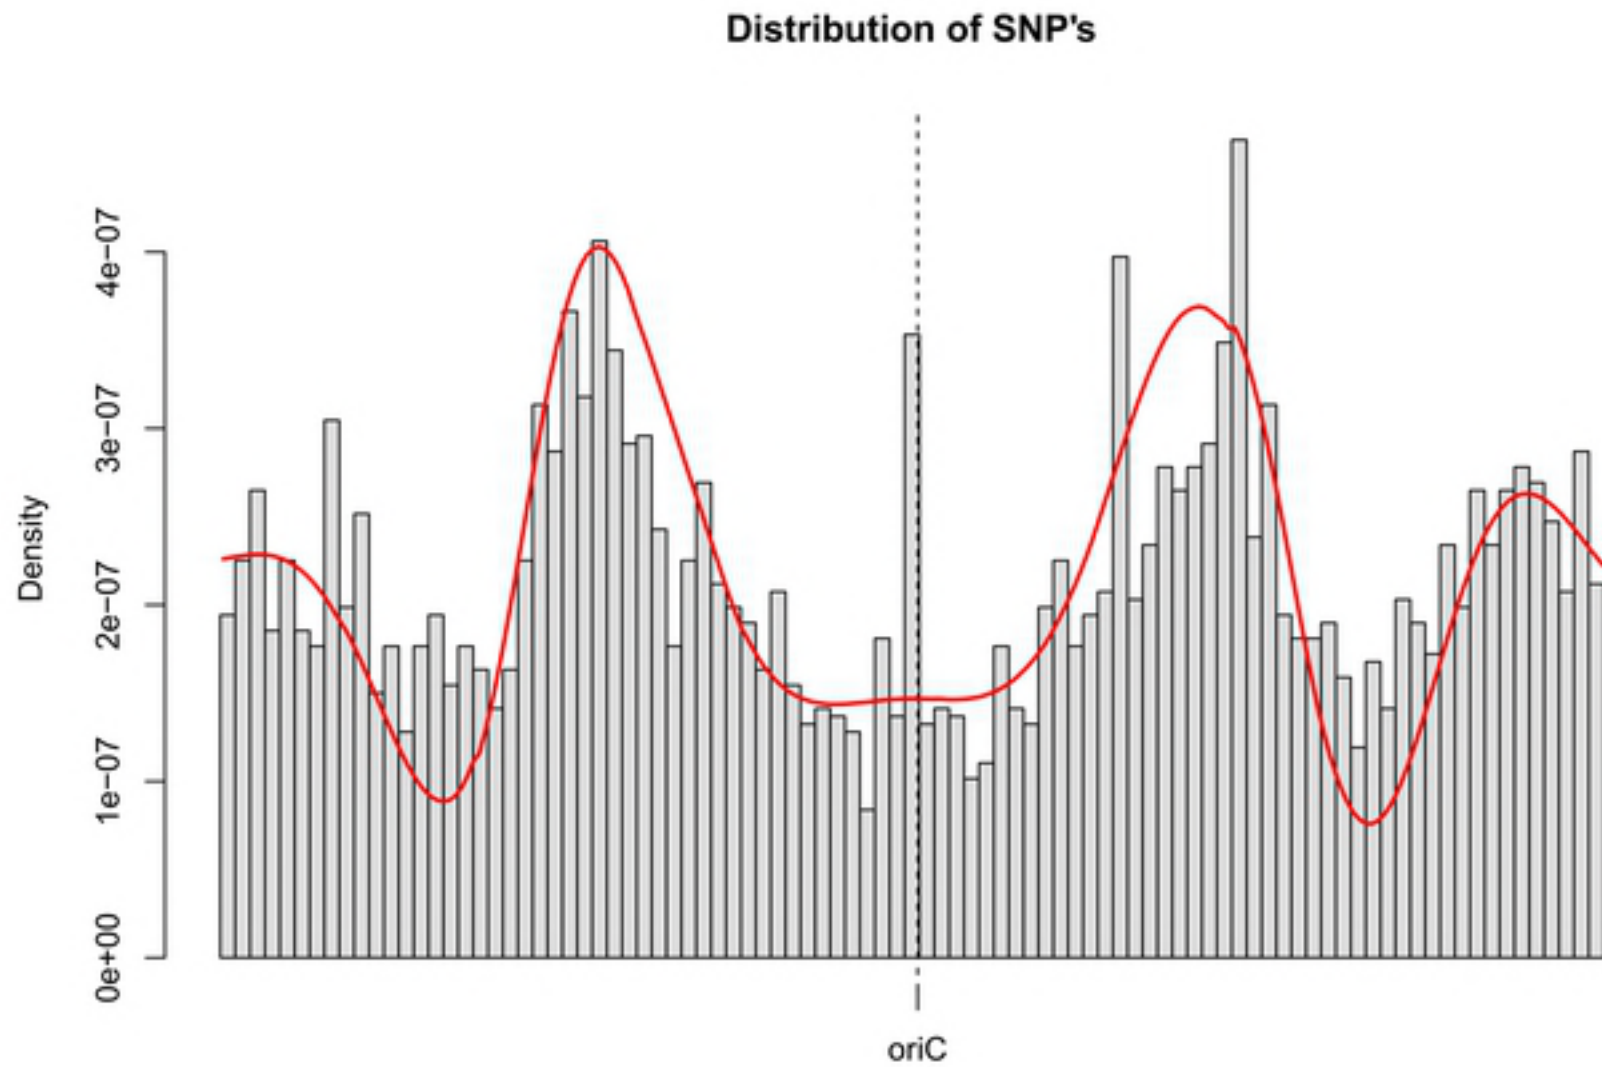

**A** Non Synonymous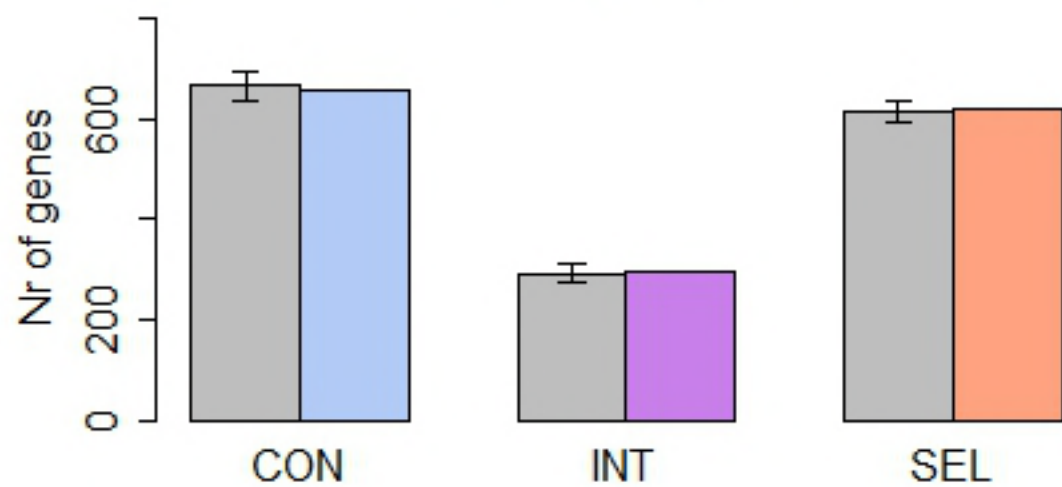**B** LOF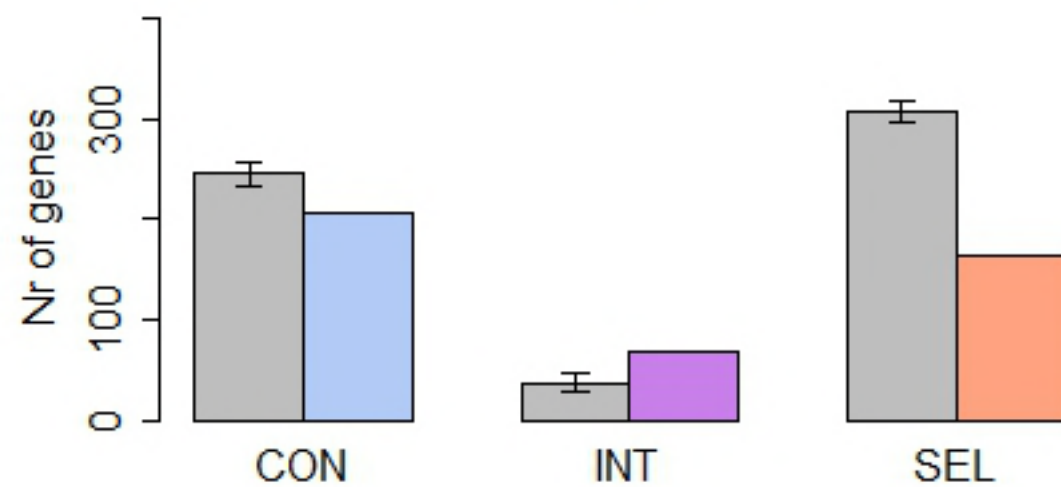**C** Non Synonymous / Selected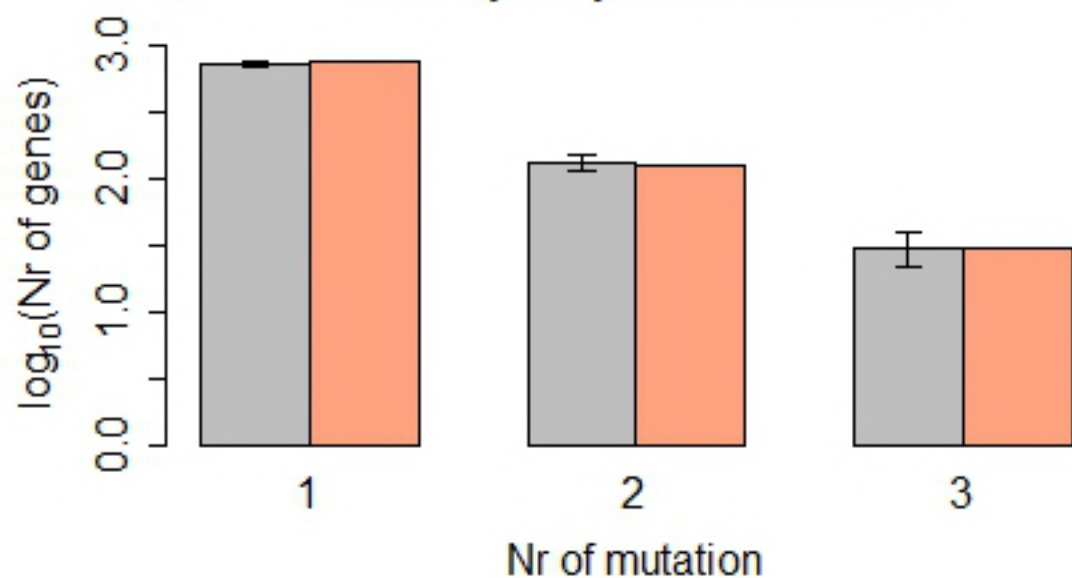**D** LOF / Selected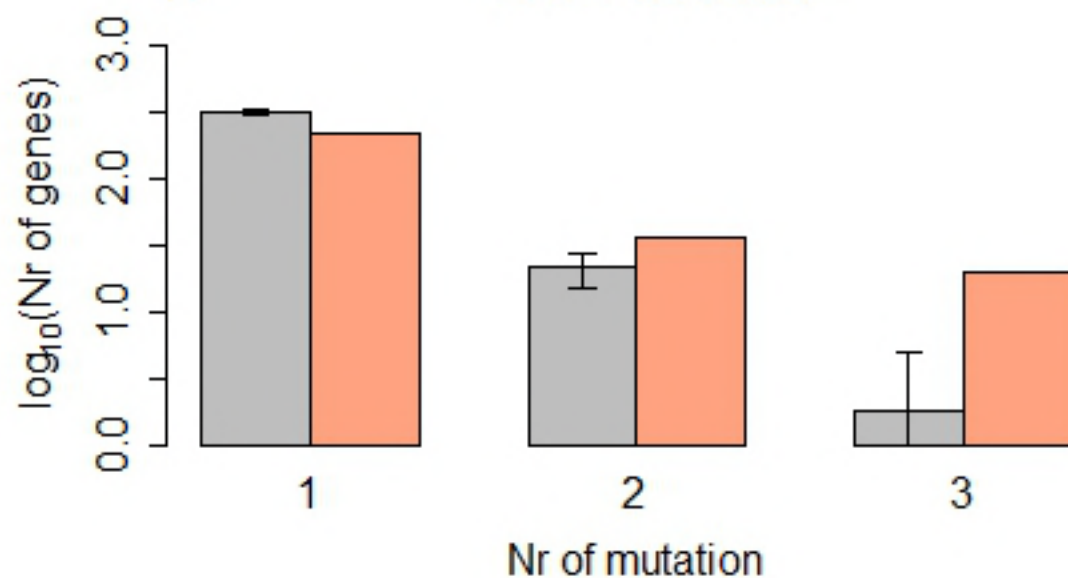**E** Non Synonymous / Control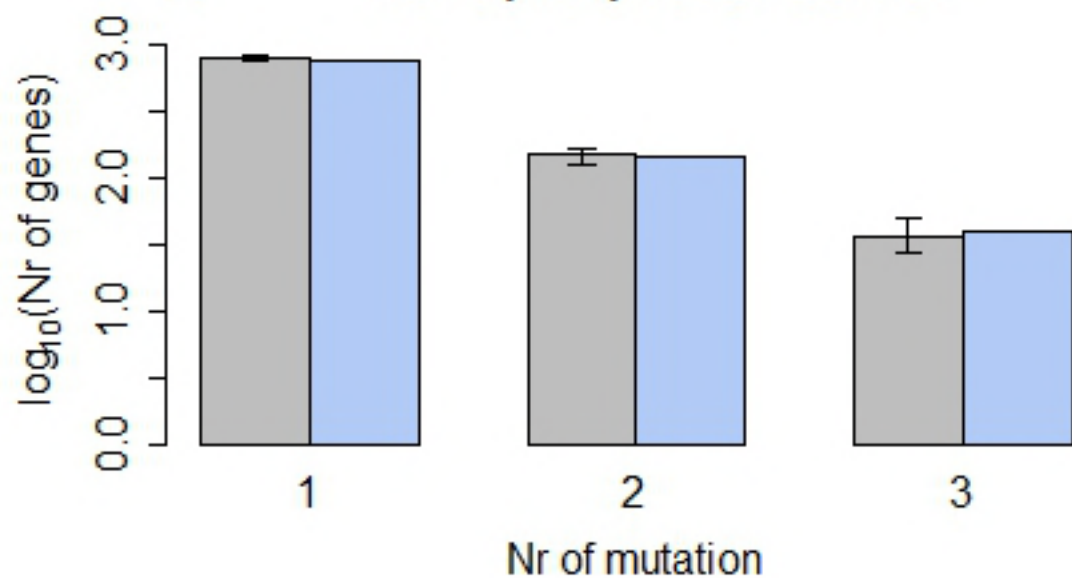**F** LOF / Control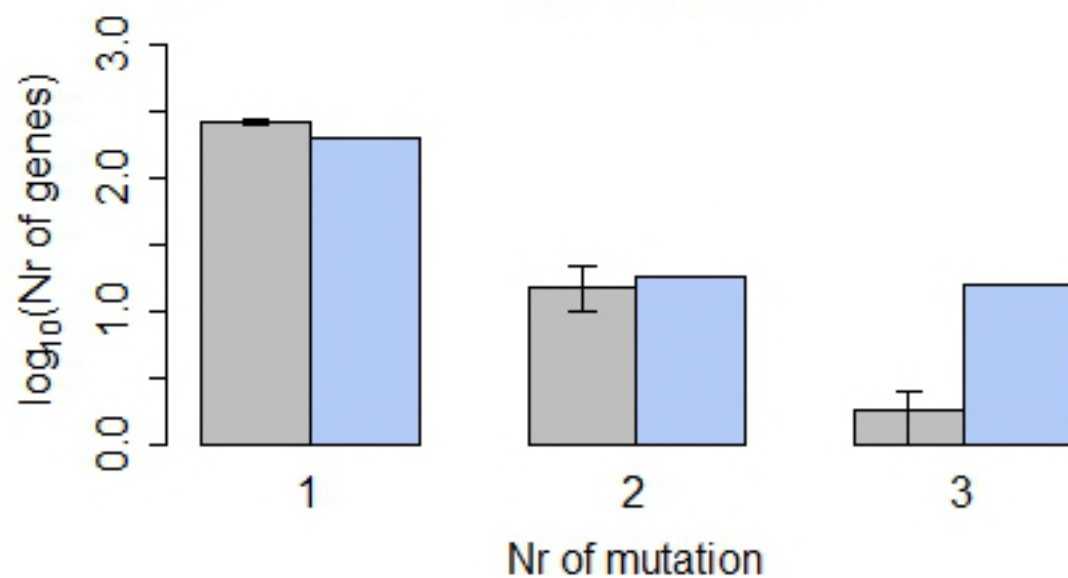

A

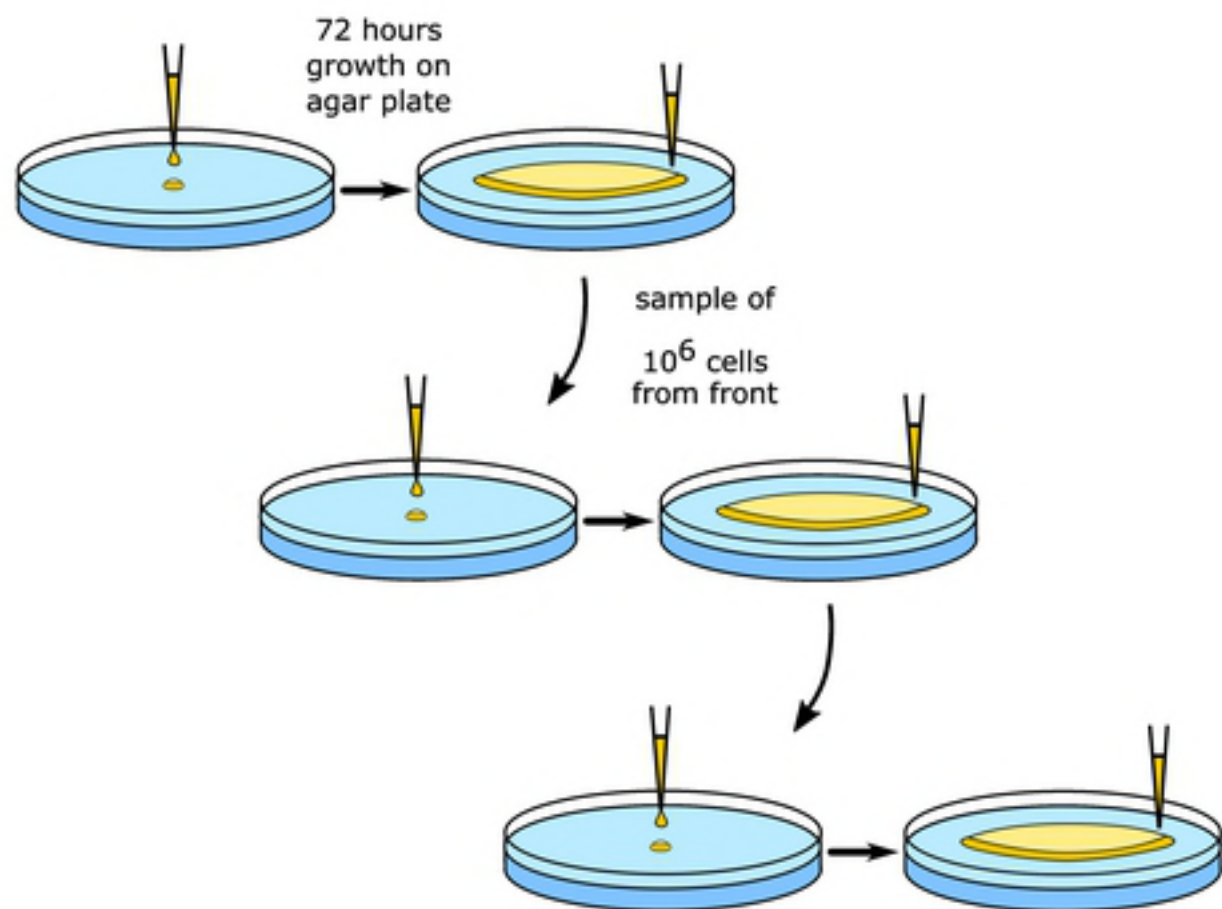

B

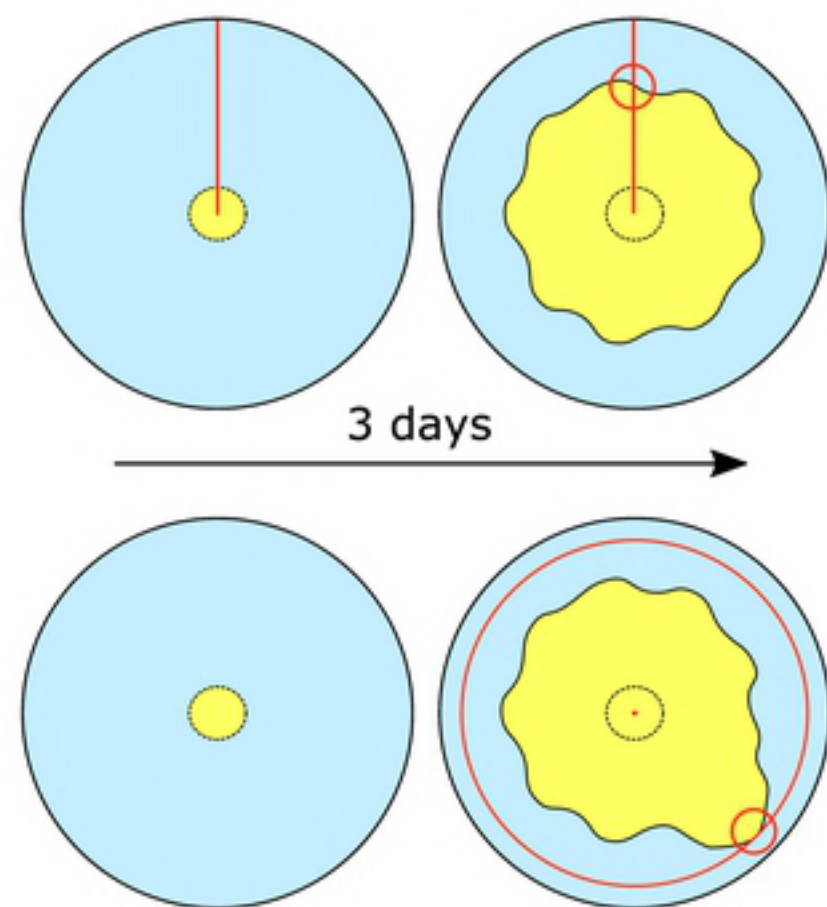

C

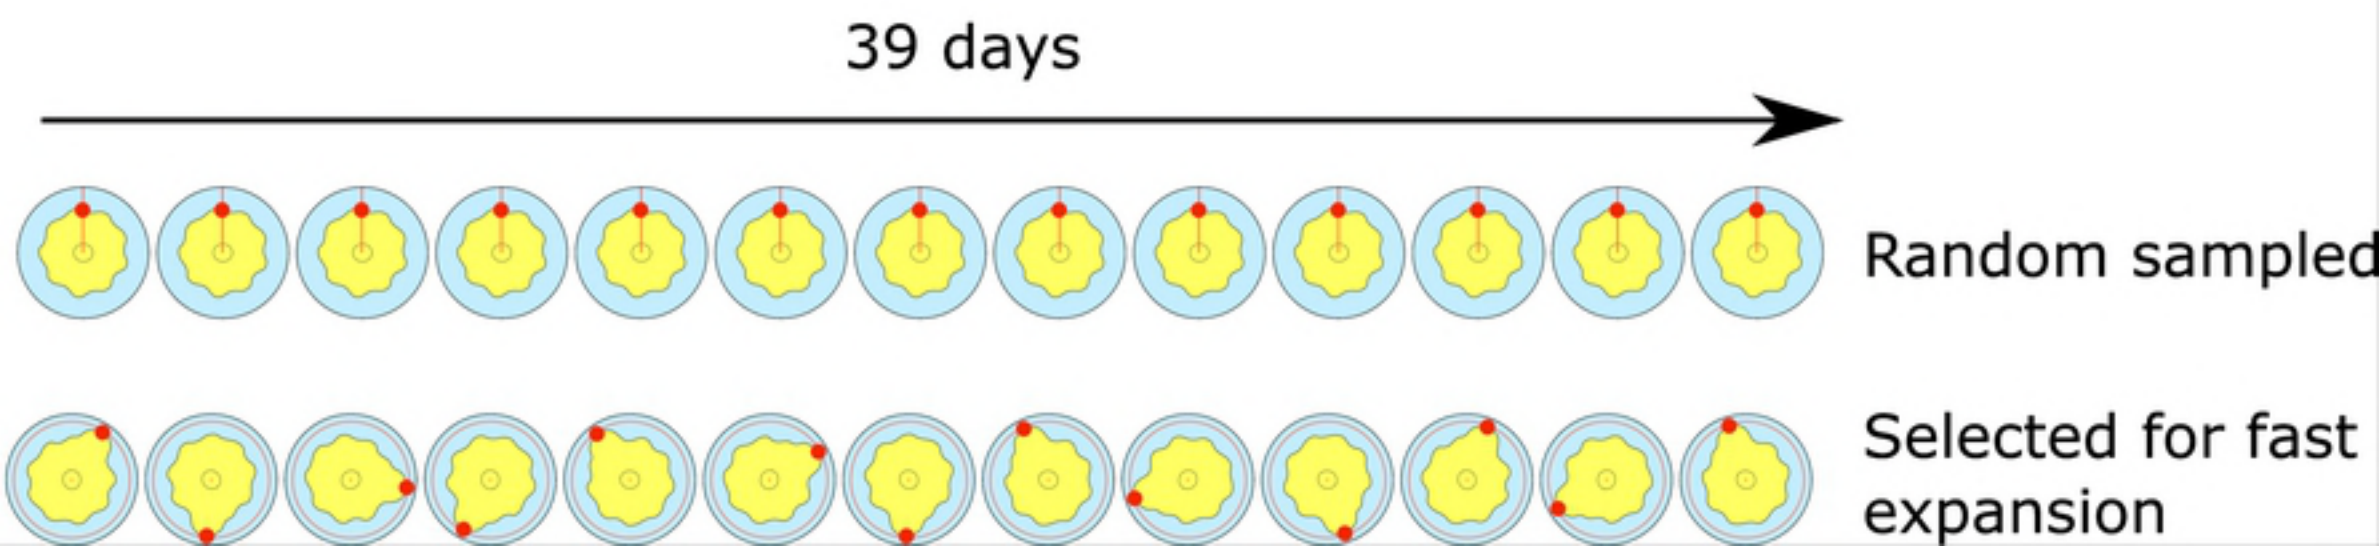

Source: http://biorxiv.org/content/10.1101/355404v1.full.pdf
